# Supplementary material for: The profile of Japanese Association for Acute Medicine – out‐of‐hospital cardiac arrest registry in 2014–2015
Source: PubMed Central journal article supplement — Acute Med Surg. 2018 Apr 25;5(3):249–58. doi: 10.1002/ams2.340 (PMC6028794; doi:10.1002/ams2.340), 2018-04-25
Supplement: AMS2-5-249-s001.pdf [file AMS2-5-249-s001.pdf]

## The JAAM-OHCA Registry Case Sheet 1 (FAX-OCR)

※ Example of description 0123456789

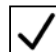

### Basic information

Hospital number  Hospital name

<Patient information> **Mandatory**

Male  Female Age  Range 0-130  Estimated age

<Time information> (Must confirm the EMS call time) **Mandatory**

|                       |   |   |      |       |       |      |      |     |
|-----------------------|---|---|------|-------|-------|------|------|-----|
| Call time (EMS)       | 2 | 0 | 1    | Year  | Month | Day  | Hour | Min |
| Hospital arrival time | 2 | 0 | Year | Month | Day   | Hour | Min  |     |

(Must fill out the physician-contact time when physicians got in ambulance or helicopter)

<Inclusion criteria (Whole)> **Mandatory**

|                                                                |                          |           |                          |            |
|----------------------------------------------------------------|--------------------------|-----------|--------------------------|------------|
| 1. Out-of-hospital cardiac arrest                              | <input type="checkbox"/> | <i>No</i> | <input type="checkbox"/> | <i>Yes</i> |
| 2. Resuscitated by EMS personnel and transported to a hospital | <input type="checkbox"/> | <i>No</i> | <input type="checkbox"/> | <i>Yes</i> |
| 3. Defibrillated by bystanders and transported to a hospital   | <input type="checkbox"/> | <i>No</i> | <input type="checkbox"/> | <i>Yes</i> |
| 4. Resuscitated by physicians in a hospital                    | <input type="checkbox"/> | <i>No</i> | <input type="checkbox"/> | <i>Yes</i> |

<Disagreement of the patient>

*No*  *Yes* (Must check if the patient or his/her family members stated the disagreement for this study)

<Comments>

### Records after hospital arrival

<Departure of ambulance or helicopter with physicians> **Mandatory**

*No*  
 *Yes* Hospital arrival time  Year  Month  Day  Hour  Min

<Patient's conditions after hospital arrival (or after contact of physicians in ambulance or helicopter)> **Mandatory**

●ROSC after hospital arrival (or after contact of physicians in ambulance or helicopter)

*No* E 1 V 1 M 1  
 *ROSC after hospital arrival*  
 Time of ROSC after hospital arrival (or after contact of physicians)  
 Year  Month  Day  Hour  Min

Consciousness at the time of ROSC

E  1~4 V  1~5 M  1~6

*The patient already got ROSC at hospital arrival (or at contact of physicians)*

Consciousness when the patient already got ROSC E  1~4 V  1~5 M  1~6

●First documented rhythm after hospital arrival (or after contact of physicians) **Mandatory**

|                                          |                                                   |                                                                                                      |
|------------------------------------------|---------------------------------------------------|------------------------------------------------------------------------------------------------------|
| <input type="checkbox"/> <i>VF</i>       | <input type="checkbox"/> <i>Pulseless VT</i>      | <input type="checkbox"/> <i>PEA</i>                                                                  |
| <input type="checkbox"/> <i>Asystole</i> | <input type="checkbox"/> <i>Presence of pulse</i> | <input type="checkbox"/> <i>Symptomatic bradycardia</i><br><i>(only in children aged 0-17 years)</i> |

●Body temperature at hospital arrival or contact of physician. (Range: 0.0-50.0)

Unmeasurable  Measurable  °C (  Tympanum  Rectum  Bladder  Axilla  Other )

Supplemental Figure 1B

The JAAM-OHCA Registry Case Sheet 2 (FAX-OCR)

|                    |   |   |   |      |                      |                      |       |                      |                      |     |                      |                      |                      |                      |                      |                      |                      |                      |                      |                      |                      |                      |
|--------------------|---|---|---|------|----------------------|----------------------|-------|----------------------|----------------------|-----|----------------------|----------------------|----------------------|----------------------|----------------------|----------------------|----------------------|----------------------|----------------------|----------------------|----------------------|----------------------|
| Hospital number    |   |   |   |      |                      |                      |       |                      |                      |     |                      | <input type="text"/> |
| Call time<br>(EMS) | 2 | 0 | 1 | Year | <input type="text"/> | <input type="text"/> | Month | <input type="text"/> | <input type="text"/> | Day | <input type="text"/> | <input type="text"/> | Hour                 | <input type="text"/> | <input type="text"/> | Min                  |                      |                      |                      |                      |                      |                      |

<Procedures after hospital arrival>

●Defibrillation (after hospital arrival or contact of physicians in ambulance or helicopter) **Mandatory**

No     Yes

●Intubation (after hospital arrival or contact of physicians in ambulance or helicopter) **Mandatory**

No     Yes     Intubated by EMS in pre-hospital settings

●ECPR (ECLS/ECMO/PCPS) **Mandatory**

No     Yes    ( Timing of pumping initiation  Before first ROSC     After first ROSC )

Time of pumping initiation

|   |   |                      |                      |      |                      |                      |       |                      |                      |     |                      |                      |      |                      |                      |     |
|---|---|----------------------|----------------------|------|----------------------|----------------------|-------|----------------------|----------------------|-----|----------------------|----------------------|------|----------------------|----------------------|-----|
| 2 | 0 | <input type="text"/> | <input type="text"/> | Year | <input type="text"/> | <input type="text"/> | Month | <input type="text"/> | <input type="text"/> | Day | <input type="text"/> | <input type="text"/> | Hour | <input type="text"/> | <input type="text"/> | Min |
|---|---|----------------------|----------------------|------|----------------------|----------------------|-------|----------------------|----------------------|-----|----------------------|----------------------|------|----------------------|----------------------|-----|

●IABP **Mandatory**

No     Yes

●CAG **Mandatory**

No     Yes    ( Occlusion or stenosis of coronary artery (more than 75%)  No     Yes )

●PCI **Mandatory**

No     Yes    ( Re-perfusion  Yes     No (Could not do re-perfusion) )

Time of re-perfusion by PCI

|   |   |                      |                      |      |                      |                      |       |                      |                      |     |                      |                      |      |                      |                      |     |
|---|---|----------------------|----------------------|------|----------------------|----------------------|-------|----------------------|----------------------|-----|----------------------|----------------------|------|----------------------|----------------------|-----|
| 2 | 0 | <input type="text"/> | <input type="text"/> | Year | <input type="text"/> | <input type="text"/> | Month | <input type="text"/> | <input type="text"/> | Day | <input type="text"/> | <input type="text"/> | Hour | <input type="text"/> | <input type="text"/> | Min |
|---|---|----------------------|----------------------|------|----------------------|----------------------|-------|----------------------|----------------------|-----|----------------------|----------------------|------|----------------------|----------------------|-----|

●Target temperature management **※ Mandatory about No or Yes**

No     Yes

Target or maintenance temperature     32°C     33°C     34°C     35°C     36°C

Time of temperature management initiation

|   |   |                      |                      |      |                      |                      |       |                      |                      |     |                      |                      |      |                      |                      |     |
|---|---|----------------------|----------------------|------|----------------------|----------------------|-------|----------------------|----------------------|-----|----------------------|----------------------|------|----------------------|----------------------|-----|
| 2 | 0 | <input type="text"/> | <input type="text"/> | Year | <input type="text"/> | <input type="text"/> | Month | <input type="text"/> | <input type="text"/> | Day | <input type="text"/> | <input type="text"/> | Hour | <input type="text"/> | <input type="text"/> | Min |
|---|---|----------------------|----------------------|------|----------------------|----------------------|-------|----------------------|----------------------|-----|----------------------|----------------------|------|----------------------|----------------------|-----|

Time of achievement of target (maintenance) temperature

|   |   |                      |                      |      |                      |                      |       |                      |                      |     |                      |                      |      |                      |                      |     |
|---|---|----------------------|----------------------|------|----------------------|----------------------|-------|----------------------|----------------------|-----|----------------------|----------------------|------|----------------------|----------------------|-----|
| 2 | 0 | <input type="text"/> | <input type="text"/> | Year | <input type="text"/> | <input type="text"/> | Month | <input type="text"/> | <input type="text"/> | Day | <input type="text"/> | <input type="text"/> | Hour | <input type="text"/> | <input type="text"/> | Min |
|---|---|----------------------|----------------------|------|----------------------|----------------------|-------|----------------------|----------------------|-----|----------------------|----------------------|------|----------------------|----------------------|-----|

Time of rewarming initiation

|   |   |                      |                      |      |                      |                      |       |                      |                      |     |                      |                      |      |                      |                      |     |
|---|---|----------------------|----------------------|------|----------------------|----------------------|-------|----------------------|----------------------|-----|----------------------|----------------------|------|----------------------|----------------------|-----|
| 2 | 0 | <input type="text"/> | <input type="text"/> | Year | <input type="text"/> | <input type="text"/> | Month | <input type="text"/> | <input type="text"/> | Day | <input type="text"/> | <input type="text"/> | Hour | <input type="text"/> | <input type="text"/> | Min |
|---|---|----------------------|----------------------|------|----------------------|----------------------|-------|----------------------|----------------------|-----|----------------------|----------------------|------|----------------------|----------------------|-----|

Time of achievement of 36°C (if 32-34°C was target (maintenance) temperature)

|   |   |                      |                      |      |                      |                      |       |                      |                      |     |                      |                      |      |                      |                      |     |
|---|---|----------------------|----------------------|------|----------------------|----------------------|-------|----------------------|----------------------|-----|----------------------|----------------------|------|----------------------|----------------------|-----|
| 2 | 0 | <input type="text"/> | <input type="text"/> | Year | <input type="text"/> | <input type="text"/> | Month | <input type="text"/> | <input type="text"/> | Day | <input type="text"/> | <input type="text"/> | Hour | <input type="text"/> | <input type="text"/> | Min |
|---|---|----------------------|----------------------|------|----------------------|----------------------|-------|----------------------|----------------------|-----|----------------------|----------------------|------|----------------------|----------------------|-----|

Achievement of temperature management     Success     Failure

Manner of temperature management (Multiple choice)

|                                           |                          |    |                          |       |                                                                       |                          |    |                          |     |   |
|-------------------------------------------|--------------------------|----|--------------------------|-------|-----------------------------------------------------------------------|--------------------------|----|--------------------------|-----|---|
| Stomach perfusion                         | <input type="checkbox"/> | No | <input type="checkbox"/> | Yes   | Body surface cooling (including water-cooled body surface pad system) | <input type="checkbox"/> | No | <input type="checkbox"/> | Yes |   |
| Intravenous injection of cooling fluid    | <input type="checkbox"/> | No | <input type="checkbox"/> | Yes   | Intravascular cooling system                                          | <input type="checkbox"/> | No | <input type="checkbox"/> | Yes |   |
| Extracorporeal circulation-heat exchanger | <input type="checkbox"/> | No | <input type="checkbox"/> | Yes   |                                                                       |                          |    |                          |     |   |
| Other                                     | <input type="checkbox"/> | No | <input type="checkbox"/> | Yes ( |                                                                       |                          |    |                          |     | ) |

<Drug use during cardiac arrest>

●Adrenaline

No     Yes

●Amiodarone

No     Yes

●Nifekalant

No     Yes

●Lidocaine

No     Yes

●Atropin

No     Yes

●Magnesium

No     Yes

●Vasopressin

No     Yes

Supplemental Figure 1C

The JAAM-OHCA Registry Case Sheet 3 (FAX-OCR)

|                 |   |   |   |  |      |  |  |       |  |     |      |     |
|-----------------|---|---|---|--|------|--|--|-------|--|-----|------|-----|
| Hospital number |   |   |   |  |      |  |  |       |  |     |      |     |
| Call time (EMS) | 2 | 0 | 1 |  | Year |  |  | Month |  | Day | Hour | Min |

<Laboratory data>

|                                            |   |   |  |      |  |  |       |  |     |      |     |
|--------------------------------------------|---|---|--|------|--|--|-------|--|-----|------|-----|
| Time of blood sampling (before first ROSC) | 2 | 0 |  | Year |  |  | Month |  | Day | Hour | Min |
| Time of blood sampling (after first ROSC)  | 2 | 0 |  | Year |  |  | Month |  | Day | Hour | Min |

| Blood gas    | Before first ROSC | After first ROSC |   |  |  |   |   |                      |
|--------------|-------------------|------------------|---|--|--|---|---|----------------------|
| PaCO2 (mmHg) |                   |                  | . |  |  |   | . | ... Range 10.0~200.0 |
| PaO2 (mmHg)  |                   |                  | . |  |  |   | . | ... Range 1.0~600.0  |
| BE (mEq/l)   |                   |                  | . |  |  |   | . | ... Range -40.0~30.0 |
| pH           |                   | .                |   |  |  | . |   | ... Range 1.00~9.00  |
| Lac          |                   |                  | . |  |  |   | . | ... Range 0.0~200.0  |
| Glu (mg/dl)  |                   |                  |   |  |  |   |   | ... Range 0~2000     |
| HCO3 (mEq/l) |                   |                  | . |  |  |   | . | ... Range 1.0~100.0  |

<Cause of CPA> **Mandatory**

Cardiac (  ACS  Other heart disease  Unknown (Estimated cardiac) )  
 Non-cardiac ※Presumed cardiac cause is a diagnosis by exclusion.  
 Cerebrovascular disease  
 Respiratory disease  
 Malignant tumor  
 External (  Traffic injury  Fall  Hanging  Drowning  Asphyxia  Drug overuse  Unknown )  
 Other  SIDS (only in children aged 0-17 years)

<12-lead ECG after ROSC> **Mandatory**

Unadministrated (including no ROSC)  Administrated (ST-elevation  Yes  No )

<Condition after hospital arrival> **Mandatory**

ICU/ward  Death at the ED  
 Time of resuscitation effort cessation 

|   |   |  |      |  |  |       |  |     |      |     |
|---|---|--|------|--|--|-------|--|-----|------|-----|
| 2 | 0 |  | Year |  |  | Month |  | Day | Hour | Min |
|---|---|--|------|--|--|-------|--|-----|------|-----|

  
 Time of death certificate 

|   |   |  |      |  |  |       |  |     |      |     |
|---|---|--|------|--|--|-------|--|-----|------|-----|
| 2 | 0 |  | Year |  |  | Month |  | Day | Hour | Min |
|---|---|--|------|--|--|-------|--|-----|------|-----|

<One-month (30-days) survival> **Mandatory**

No  Yes (  Hospitalized  Discharge to survival )

<CPC at one-month (30-days) after OHCA> **Mandatory** (only in adults aged >=18 years)

(CPC: 1 good 2 moderate 3 severe 4 vegetative 5 death)

1  2  3  4  5

<PCPC at one-month (30-days) after OHCA> **Mandatory** (only in children aged 0-17 years)

(CPC: 1 good 2 mild 3 moderate 4 severe 5 vegetative 6 death)

1  2  3  4  5  6
